# Supplementary material
Source: PubMed Central journal article supplement (PMC2533205)
Supplement: 0801613105_0801613105SI.pdf [file 0801613105_0801613105SI.pdf]

# Supporting Information

Yamakuchi *et al.* 10.1073/pnas.0801613105

## SI Text

**Cell Culture.** HeLa and HEK293 cells (American Type Culture Collection, Manassas, VA) were cultured in DMEM media (Invitrogen) supplemented with 10% FBS. HCT116 (p53 wt and p53 knockout) cells (Bert Vogelstein, The Johns Hopkins University School of Medicine) were cultured in McCoy's 5A media supplement with 10% FBS.

**Northern blot analysis.** Total RNA were extracted from cells by using TRIzol (Invitrogen). Human tissue RNAs were obtained from Applied Biosystems. For Northern blot analysis of

miroRNA, 10  $\mu$ g of each RNA were loaded onto 15% TBU-gel (Invitrogen), transferred to a nitrocellulose membrane, and hybridized with  $^{32}$ P-end-labeled probes specific for miR-34a or scrambled oligonucleotide at 42°C for 16 h. The miR-34a probe, 5'-AACAACCAGCTAAGACACTGCCA-3' was synthesized by Integrated DNA Technologies. All other reagents were purchased from Applied Biosystems.

**Western blot analysis.** Antibodies to acetylated p53 were from Cell Signaling Technology. All other primary antibodies and appropriate secondary antibodies were from Santa Cruz.

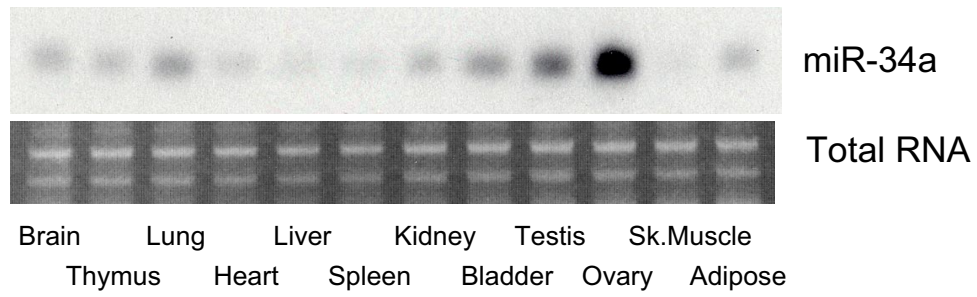

Fig. S1. Expression of miR-34a in human tissues by Northern blot analysis.

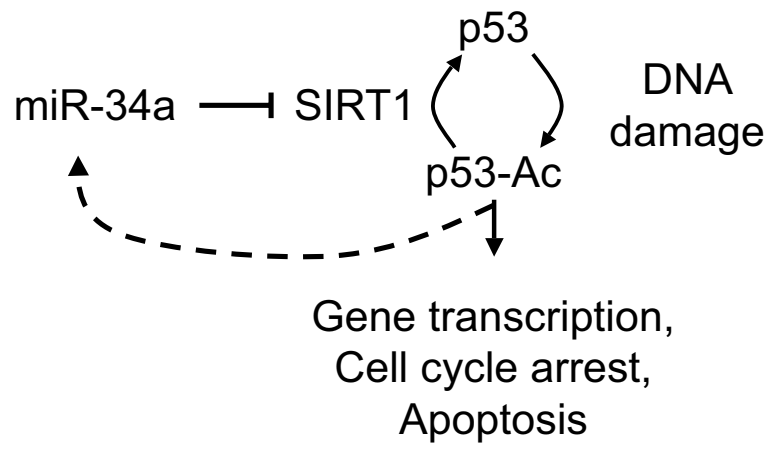

Fig. S2. Schematic of proposed mechanism for miR-34a regulation of SIRT1 and p53 signaling.
